# Supplementary figures and images for: Sex- and Regio-Specific Lipid Profiling of Shishamo and Capelin Fish by Nontargeted Liquid Chromatography/Mass Spectrometry
Source: MDPI journal article supplement (doi:10.3390/foods15020298), 2026-01-14

## Female Head

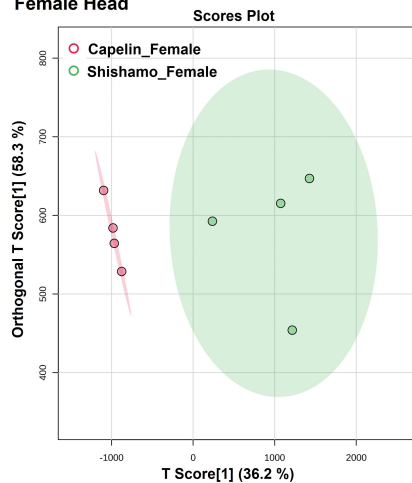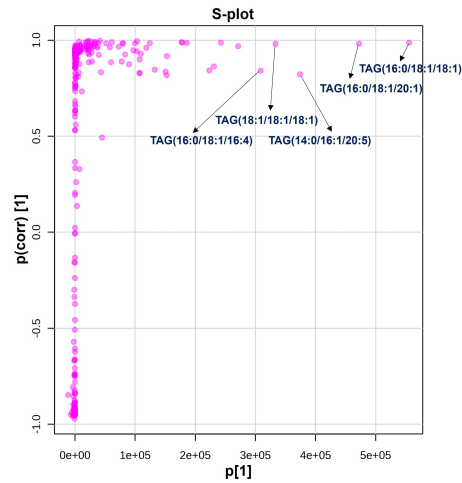

## Female Meat

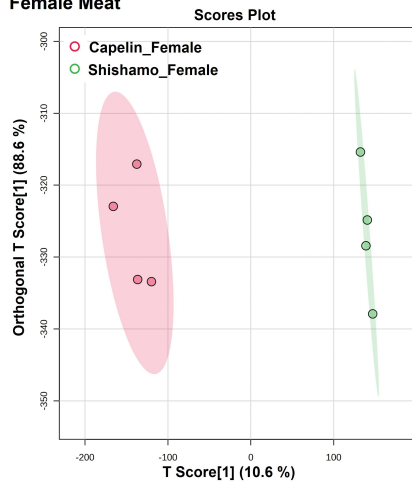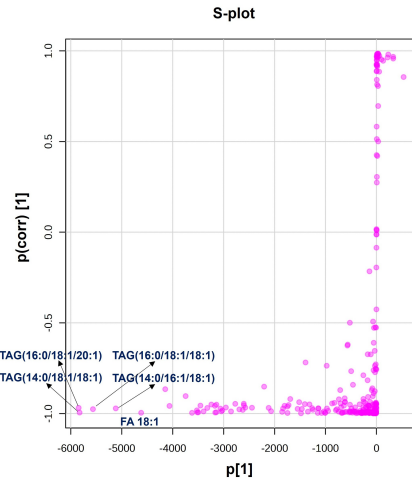

## Female Roe

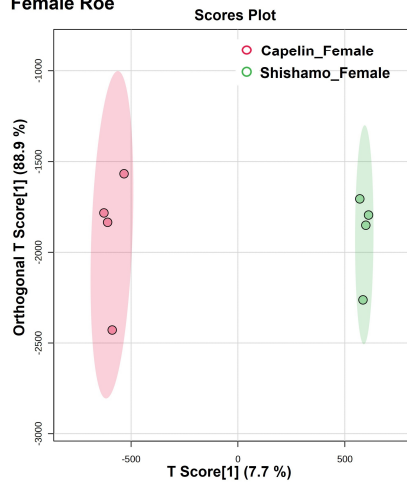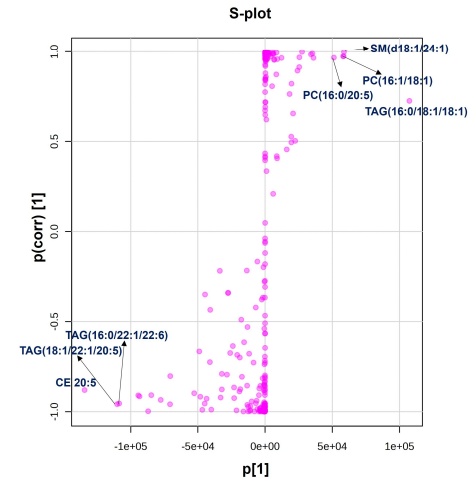

## Male Head

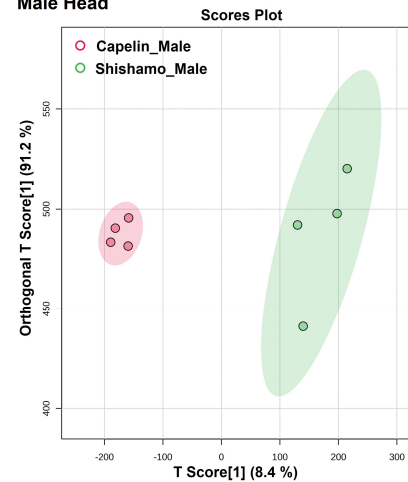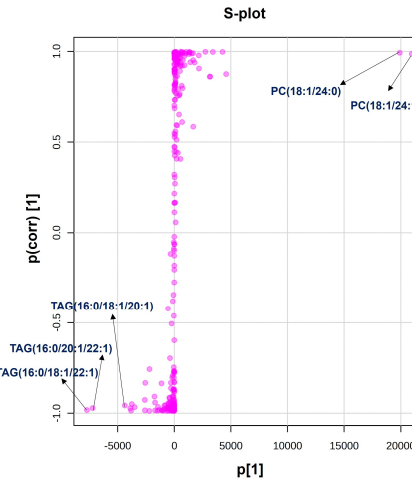

## Male Meat

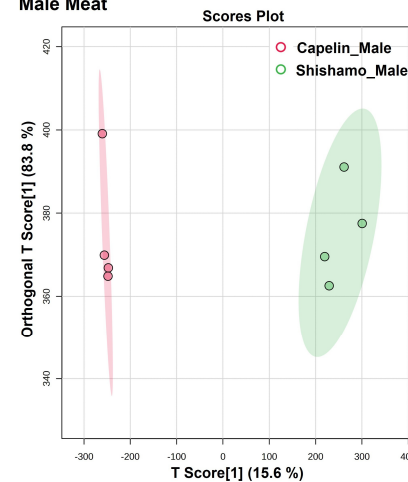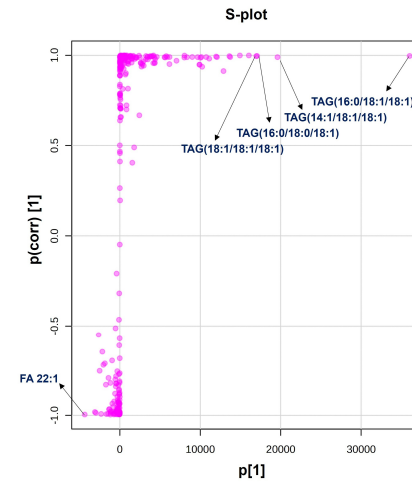

Supplement: s1 [file Supplementary Figure S1.pdf › Supplementary Figure S1.pdf]
